# Supplementary material
Source: Springer Nature journal article supplement (https://www.springermedizin.de/resource/supplementary/12877_2014_1045_MOESM1_ESM.pdf/9440698)

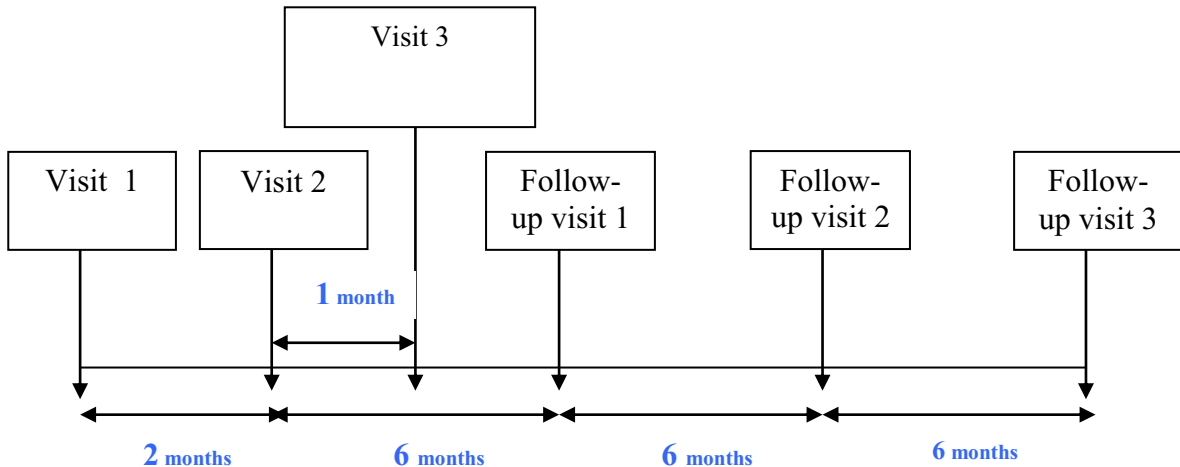

Supplement: MOESM1 [file 9440698]
